# Supplementary material for: Cysteamine broadly improves the anti-plasmodial activity of artemisinins against murine blood stage and cerebral malaria
Source: PubMed Central journal article supplement (PMC4858922; doi:10.1186/s12936-016-1317-3), 2016-05-06

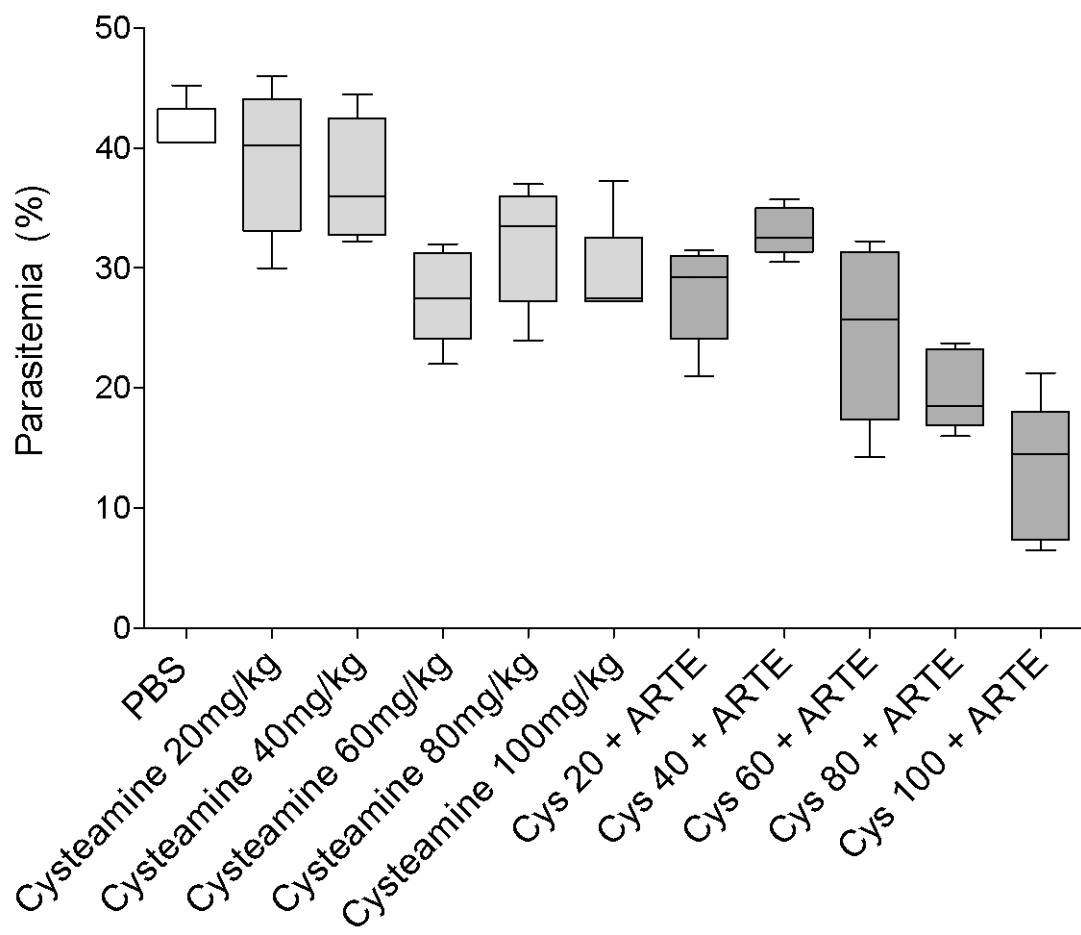

Supplement: 12936_2016_1317_MOESM2_ESM.pdf [file 12936_2016_1317_MOESM2_ESM.pdf]
