# Supplementary material for: Cysteamine broadly improves the anti-plasmodial activity of artemisinins against murine blood stage and cerebral malaria
Source: Springer Nature journal article supplement (doi:10.1186/s12936-016-1317-3), 2016-05-05

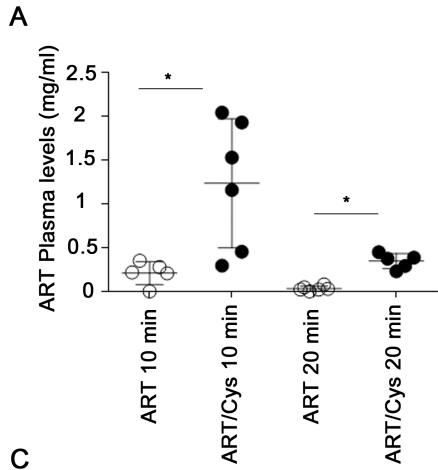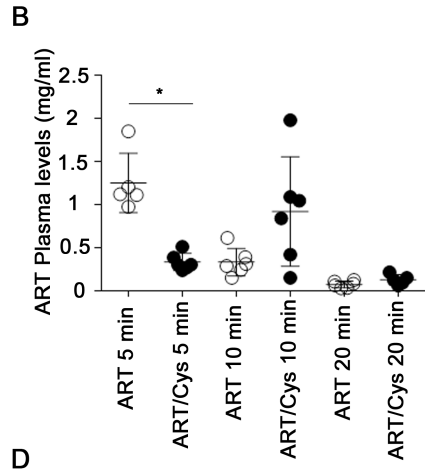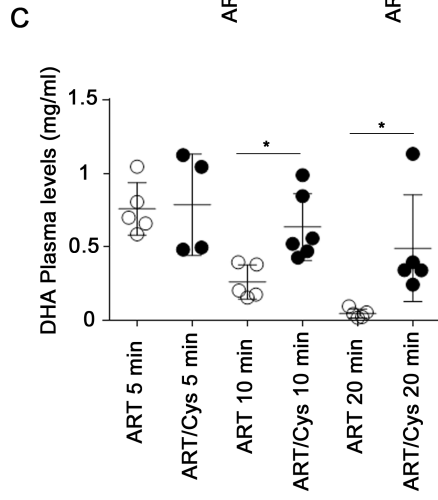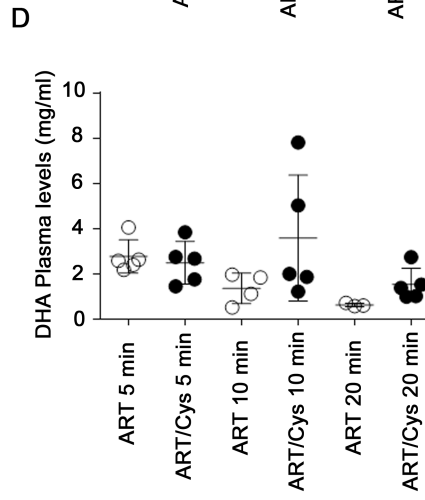

Supplement: MOESM3 [file 10111276]
